# TABLE OF CONTENTS

# ANESTHESIOLOGY

Volume 132  
Issue 2  
February 2020

◇ **This Month in ANESTHESIOLOGY** ..... 1A  
**Science, Medicine, and the Anesthesiologist**..... 13A  
**Infographics in Anesthesiology** ..... 17A

◆ **Editorial**

**Robots Will Perform Anesthesia in the Near Future**  
*T. M. Hemmerling*.....219

**Negative Trials, and What to Do with Them?**  
**First, Stop Calling Them “Negative”**  
*D. I. Sessler* .....221

**Practice Parameters**

◆ **Practice Advisory for the Perioperative Management of Patients with Cardiac Implantable Electronic Devices: Pacemakers and Implantable Cardioverter–Defibrillators 2020: An Updated Report by the American Society of Anesthesiologists Task Force on Perioperative Management of Patients with Cardiac Implantable Electronic Devices** ..... 225

This practice advisory updates the “Practice Advisory for the Perioperative Management of Patients with Cardiac Implantable Electronic Devices: Pacemakers and Implantable Cardioverter–Defibrillators: An Updated Report by the American Society of Anesthesiologists Task Force on Perioperative Management of Patients with Cardiac Implantable Electronic Devices,” adopted by the American Society of Anesthesiologists in 2010 and published in 2011. This updated advisory is intended for use by anesthesiologists and all other individuals who deliver or who are responsible for anesthesia care. The update may also serve as a resource for other physicians and healthcare professionals who manage patients with cardiac implantable electronic devices. *SUPPLEMENTAL DIGITAL CONTENT IS AVAILABLE IN THE TEXT*

**Perioperative Medicine**

**CLINICAL SCIENCE**

◆ **Anesthetic Management Using Multiple Closed-loop Systems and Delayed Neurocognitive Recovery: A Randomized Controlled Trial**  
 *A. Joosten, J. Rinehart, A. Bardaji, P. Van der Linden, V. Jame, L. Van Obbergh, B. Alexander, M. Cannesson, S. Vacas, N. Liu, H. Slama, L. Barvais* .....253

Closed-loop, automated management of anesthetic, analgesic, fluid, and ventilation parameters was superior to manual control and might influence postoperative outcomes. *SUPPLEMENTAL DIGITAL CONTENT IS AVAILABLE IN THE TEXT*

◆ **Timing of  $\beta$ -Blocker Reintroduction and the Occurrence of Postoperative Atrial Fibrillation after Cardiac Surgery: A Prospective Cohort Study**  
 *C. Couffignal, J. Amour, N. Ait-Hamou, B. Cholley, J.-L. Fellahi, X. Duval, Y. Costa De Beauregard, P. Nataf, M.-P. Dilly, S. Provenchère, P. Montravers, F. Mentré, D. Longrois* .....267

There was little advantage to reintroducing  $\beta$ -blockers within 48 h. The odds of atrial fibrillation were significantly reduced by restarting  $\beta$ -blockers between 72 and 96 h after surgery. *SUPPLEMENTAL DIGITAL CONTENT IS AVAILABLE IN THE TEXT*

◆ **Correlation of Thromboelastography with Apparent Rivaroxaban Concentration: Has Point-of-Care Testing Improved?**  
 *S. P. Myers, M. R. Dyer, A. Hassouna, J. B. Brown, J. L. Sperry, M. P. Meyer, M. R. Rosengart, M. D. Neal* .....280

The use of a modified thromboelastography assay demonstrated significant correlations with rivaroxaban concentrations but values were within normal ranges, and therefore clinical utility is limited. As a result, other methods to assay rivaroxaban and other Xa inhibitor concentrations are needed to determine the anticoagulant effects of these agents when needed. *SUPPLEMENTAL DIGITAL CONTENT IS AVAILABLE IN THE TEXT*

◇ Refers to This Month in ANESTHESIOLOGY

◆ Refers to Editorial Views

 This article has an Audio Podcast

 See Supplemental Digital Content

 CME Article

 This article has a Video Abstract

 Part of the Letheron writing competition

 This article has a Visual Abstract

 Readers' Toolbox

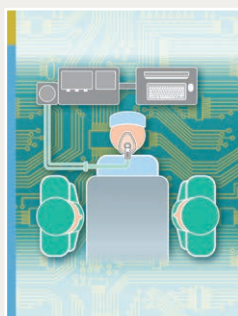

**ON THE COVER:** Automated management of anesthetic depth is now entirely feasible. In this issue of ANESTHESIOLOGY, Joosten *et al.* demonstrated that closed-loop, automated management of anesthetic, analgesic, fluid, and ventilation parameters was superior to manual control and might influence postoperative outcomes. In an accompanying Editorial, Hemmerling tell us that robotic anesthesia will soon be available and offer some ideas about how the anesthesiologist-of-the-future might interface with automated systems. Cover Illustration: S. M. Jarret, M.F.A., C.M.I.

- Joosten *et al.*: Anesthetic Management Using Multiple Closed-loop Systems and Delayed Neurocognitive Recovery: A Randomized Controlled Trial, p. 253
- Hemmerling: Robots Will Perform Anesthesia in the Near Future, p. 219

  **Associations of Intraoperative Radial Arterial Systolic, Diastolic, Mean, and Pulse Pressures with Myocardial and Acute Kidney Injury after Noncardiac Surgery: A Retrospective Cohort Analysis**

S. Ahuja, E. J. Mascha, D. Yang, K. Maheshwari, B. Cohen, A. K. Khanna, K. Ruetzler, A. Turan, D. I. Sessler .....291

For each blood pressure component, the authors report significant and clinically meaningful associations between the lowest pressure sustained for 5 min and myocardial and kidney injury. Absolute population risk thresholds were similar for myocardial and kidney injury, being roughly 90 mmHg for systolic, 65 mmHg for mean, 50 mmHg for diastolic, and 35 mmHg for pulse pressures. The odds for myocardial and kidney injury progressively increased with duration and severity of hypotension below each threshold, even after adjusting for potential baseline confounding factors. *SUPPLEMENTAL DIGITAL CONTENT IS AVAILABLE IN THE TEXT*

**Critical Care Medicine**

**BASIC SCIENCE**

  **Static and Dynamic Transpulmonary Driving Pressures Affect Lung and Diaphragm Injury during Pressure-controlled *versus* Pressure-support Ventilation in Experimental Mild Lung Injury in Rats**

E. F. Pinto, R. S. Santos, M. A. Antunes, L. A. Maia, G. A. Padilha, J. de A. Machado, A. C. F. Carvalho, M. V. S. Fernandes, V. L. Capelozzi, M. Gama de Abreu, P. Pelosi, P. R. M. Rocco, P. L. Silva ..... 307

In a rat model of mild lung injury caused by intratracheal endotoxin administration, animals received both pressure-support and pressure-controlled ventilation, and effects on driving pressures were measured, along with lung inflammation and diaphragm inflammation. Pressure-support *versus* pressure-controlled ventilation was associated with higher dynamic (but not static) transpulmonary driving pressure, while markers of lung and diaphragm inflammation did not differ between ventilation modes. *SUPPLEMENTAL DIGITAL CONTENT IS AVAILABLE IN THE TEXT*

**Heart Rate Control during Experimental Sepsis in Mice: Comparison of Ivabradine and  $\beta$ -Blockers**

A. Bedet, G. Voiriot, J. Ternacle, E. Marcos, S. Adnot, G. Derumeaux, A. M. Dessap .....321

This study assesses the effects of ivabradine, atenolol, and placebo in the setting of murine peritonitis. Mice that received atenolol *versus* ivabradine both experienced a similar and significant decline in heart rate. The mice in the atenolol group also experienced a significant decrease in cardiac output, systolic blood pressure, and left ventricular systolic function that was not experienced by the mice who received ivabradine. Mice who received atenolol *versus* ivabradine *versus* placebo did not have significantly different survival 60 h after induction of sepsis. Future studies are needed to determine the value of ivabradine *versus* atenolol for heart rate control in human sepsis.

**Pain Medicine**

**CLINICAL SCIENCE**

 **Postoperative Pain and Analgesic Requirements in the First Year after Intraoperative Methadone for Complex Spine and Cardiac Surgery**

G. S. Murphy, M. J. Avram, S. B. Greenberg, T. D. Shear, M. A. Deshur, D. Dickerson, S. Billimoria, J. Benson, C. E. Maher, G. J. Trenk, K. J. Teister, J. W. Szokol .....330

Using data from two previously completed trials, it was observed that a single intraoperative dose of methadone was associated with fewer episodes of pain during the first month after cardiac surgery and the first 3 months after spinal surgery. Fewer spine surgery patients who received methadone intraoperatively were receiving opioids 3 months after surgery, suggesting a possible reduction in chronic opioid use.

**BASIC SCIENCE**

 **Oral Dimethyl Fumarate Reduces Peripheral Neuropathic Pain in Rodents *via* NFE2L2 Antioxidant Signaling**

J. Li, J. Ma, M. J. Lacagnina, S. Lorca, M. A. Odem, E. T. Walters, A. Kavelaars, P. M. Grace .....343

Using a rat model of nerve injury, both male and female animals displayed reduced mechanical and nociceptive sensitization when given dimethyl fumarate. Dimethyl fumarate administration increased superoxide dismutase activity while decreasing cytokine expression and improving mitochondrial bioenergetics. *SUPPLEMENTAL DIGITAL CONTENT IS AVAILABLE IN THE TEXT*

 **Endoplasmic Reticulum Stress Contributes to Nociception *via* Neuroinflammation in a Murine Bone Cancer Pain Model**

Y. Mao, C. Wang, X. Tian, Y. Huang, Y. Zhang, H. Wu, S. Yang, K. Xu, Y. Liu, W. Zhang, X. Gu, Z. Ma .....357

Using a murine model of bone cancer pain, it was observed that tumor growth was associated with the spinal production of inflammatory mediators and increased expression of endoplasmic reticulum stress markers. The pharmacologic inhibition of endoplasmic reticulum stress reduced pain-related behaviors and the production of inflammatory mediators in spinal tissue. *SUPPLEMENTAL DIGITAL CONTENT IS AVAILABLE IN THE TEXT*

**Education**

**IMAGES IN ANESTHESIOLOGY**

**“Arterialization” of the Central Venous Pressure Waveform from a Peripheral Arteriovenous Fistula**

A. D. Lichtman .....373

**Sustained Ventricular Tachycardia Secondary to R-on-T Phenomenon Caused by Temporary Ventricular Epicardial Pacemaker Undersensing after Cardiac Surgery**

M. Y. Chen, T. Mundangeppufu .....374

**Postintubation Tracheal Rupture Detected by Virtual Endoscopy and Curved Planar Reformation**  
*R. Zhu, F. Lang, M. Li, W. Gu* .....375

**Sick Sinus Syndrome: Sinus Node Dysfunction in the Elderly**  
*S. Khanna, R. Sreedharan, C. Trombetta, K. Ruetzler* .....377

**REVIEW ARTICLE**

🌐 ◇ **Artificial Intelligence in Anesthesiology: Current Techniques, Clinical Applications, and Limitations**  
*D. A. Hashimoto, E. Witkowski, L. Gao, O. Meireles, G. Rosman* .....379

This scoping review of artificial intelligence in anesthesiology summarizes six areas of research: (1) depth of anesthesia monitoring, (2) control of anesthesia, (3) event/risk prediction, (4) ultrasound guidance, (5) pain management, and (6) operating room logistics. *SUPPLEMENTAL DIGITAL CONTENT IS AVAILABLE IN THE TEXT*

**MIND TO MIND**

🖋️ **From Room 1000**  
*J. Bethany* .....395

**An Ode to the Cookie Lady**  
*A. De*.....396

**Correspondence**

**Intravenous Lidocaine and Postoperative Cognition: Comment**  
*S.-j. Cao, T. Zhu* .....398

**Intravenous Lidocaine and Postoperative Cognition: Reply**  
*R. Y. Klinger, J. P. Mathew* .....398

**Opioid-induced Miosis Is Unaltered by Obstructive Sleep Apnea: Comment**  
*A. M. Webber, S. B. Karan*.....399

**Opioid-induced Miosis Is Unaltered by Obstructive Sleep Apnea: Reply**  
*M. C. Montana*.....400

**Reviews of Educational Materials..... 402**

**Announcements ..... 403**

**Erratum ..... 405**

**Anesthesiology Reflections From The Wood Library-Museum**

**Bitter Gold Analgesia: Grover Cleveland’s Remedy**  
*Jane S. Moon and George S. Bause* .....266

**George Brett and His Brettometer: The Anesthesia Machine or the Slugging Machine?**  
*George S. Bause*.....279

**In His *Sleeping Car*, Rev. Dr. Kelso Carter Lullabied “Twilight Anesthesia”**  
*Melissa L. Coleman and George S. Bause*.....306

**Byline Backstory No. 1: A Twice-Burned Toddler Finds Anesthetic Relief**  
*George S. Bause*.....329

**Careers & Events ..... 19A**

## INSTRUCTIONS FOR AUTHORS

The most recently updated version of the Instructions for Authors is available at [www.anesthesiology.org](http://www.anesthesiology.org). Please refer to the Instructions for the preparation of any material for submission to ANESTHESIOLOGY.

Manuscripts submitted for consideration for publication must be submitted in electronic format via Editorial Manager (<https://www.editorialmanager.com/aln>). Detailed directions for submission and the most recent version of the Instructions for Authors can be found on the Journal's Web site (<http://www.anesthesiology.org>). Books and educational materials for review should be sent to Alan Jay Schwartz, M.D., M.S.Ed., Director of Education, Department of Anesthesiology and Critical Care Medicine, The Children's Hospital of Philadelphia,

34th Street and Civic Center Blvd., Room 9327, Philadelphia, Pennsylvania 19104-4399. Article-specific permission requests are managed with Copyright Clearance Center's Rightslink service. Information can be accessed directly from articles on the journal Web site. More information is available at <http://anesthesiology.pubs.asahq.org/public/rightsandpermissions.aspx>. For questions about the Rightslink service, e-mail [customer-care@copyright.com](mailto:customer-care@copyright.com) or call 877-622-5543 (U.S. only) or 978-777-9929. Advertising and related correspondence should be addressed to Advertising Manager, ANESTHESIOLOGY, Wolters Kluwer Health, Inc., Two Commerce Square, 2001 Market Street, Philadelphia, Pennsylvania 19103 (Web site: <http://www.wkadcenter.com/>). Publication of an advertisement in ANESTHESIOLOGY does not constitute endorsement by the Society or Wolters Kluwer Health, Inc. of the product or service described therein or of any representations made by the advertiser with respect to the product or service.

**ANESTHESIOLOGY** (ISSN 0003-3022) is published monthly by Wolters Kluwer Health, Inc., 14700 Citicorp Drive, Bldg 3, Hagerstown, MD 21742. Business office: Two Commerce Square, 2001 Market Street, Philadelphia, PA 19103. Periodicals postage paid at Hagerstown, MD, and at additional mailing offices. Copyright © 2020, the American Society of Anesthesiologists, Inc. All Rights Reserved.

**Annual Subscription Rates:** *United States*—\$1026 Individual, \$2451 Institution, \$413 In-training. *Rest of World*—\$1082 Individual, \$2721 Institution, \$413 In-training. Single copy rate \$245. Subscriptions outside of North America must add \$57 for airfreight delivery. Add state sales tax, where applicable. The GST tax of 7% must be added to all orders shipped to Canada (Wolters Kluwer Health, Inc.'s GST Identification #895524239, Publications Mail Agreement #1119672). Indicate in-training status and name of institution. Institution rates apply to libraries, hospitals, corporations, and partnerships of three or more individuals. Subscription prices outside the United States must be prepaid. Prices subject to change without notice. Subscriptions will begin with currently available issue unless otherwise requested. Visit us online at [www.lww.com](http://www.lww.com).

Individual and in-training subscription rates include print and access to the online version. Online-only subscriptions for individuals (\$339) and persons in training (\$339) are available to nonmembers and may be ordered by downloading a copy of the Online Subscription FAXback Form from the Web site, completing the information requested, and faxing the completed form to 301-223-2400. Institutional rates are for print only; online subscriptions are available via Ovid. Institutions can choose to purchase a print and online subscription together for a discounted rate. Institutions that wish to purchase a print subscription, please contact Wolters Kluwer Health, Inc., 14700 Citicorp Drive, Bldg 3, Hagerstown, MD 21742; phone: 800-638-3030; fax: 301-223-2400. Institutions

that wish to purchase an online subscription or online with print, please contact the Ovid Regional Sales Office near you or visit [www.ovid.com/site/index.jsp](http://www.ovid.com/site/index.jsp) and select Contact and Locations.

**Address for non-member subscription information, orders, or change of address** (except Japan): Wolters Kluwer Health, Inc., 14700 Citicorp Drive, Bldg 3, Hagerstown, MD 21742; phone: 800-638-3030; fax: 301-223-2400. In Japan, contact Wolters Kluwer Health Japan Co., Ltd., Forecast Mita Building 5th floor, 1-3-31 Mita Minato-ku, Tokyo, Japan 108-0073; phone: +81 3 5427 1969.

**Address for member subscription information, orders, or change of address:** Members of the American Society of Anesthesiologists receive the print and online journal with their membership. To become a member or provide a change of address, please contact the American Society of Anesthesiologists, 1061 American Lane, Schaumburg, Illinois 60173-4973; phone: 847-825-5586; fax: 847-825-1692; e-mail: [membership@ASAhq.org](mailto:membership@ASAhq.org). For all other membership inquiries, contact Wolters Kluwer Health, Inc., Customer Service Department, P.O. Box 1610, Hagerstown, MD 21740; phone: 800-638-3030; fax: 301-223-2400.

**Postmaster:** Send address changes to ANESTHESIOLOGY, P.O. BOX 1610, Hagerstown, MD 21740.

**Advertising:** Please contact Hilary Druker, National Account Manager, Health Learning, Research & Practice, Medical Journals, Wolters Kluwer Health, Inc.; phone: 609-304-9187; e-mail: [Hilary.Druker@wolterskluwer.com](mailto:Hilary.Druker@wolterskluwer.com). For classified advertising: Dave Wiegand, Recruitment Advertising Representative, Wolters Kluwer Health, Inc.; phone: 847-361-6128; e-mail: [Dave.Wiegand@wolterskluwer.com](mailto:Dave.Wiegand@wolterskluwer.com).
